# Supplementary material for: Quantification of the Nucleophilicities of 3-X-Thiophenes: Highlighting the Hyperortho Correlation
Source: Hindawi journal article supplement (doi:10.1155/2020/2164759), 2020-03-19
Supplement: f1 [file 2164759.f1.pdf]

## Supporting Information

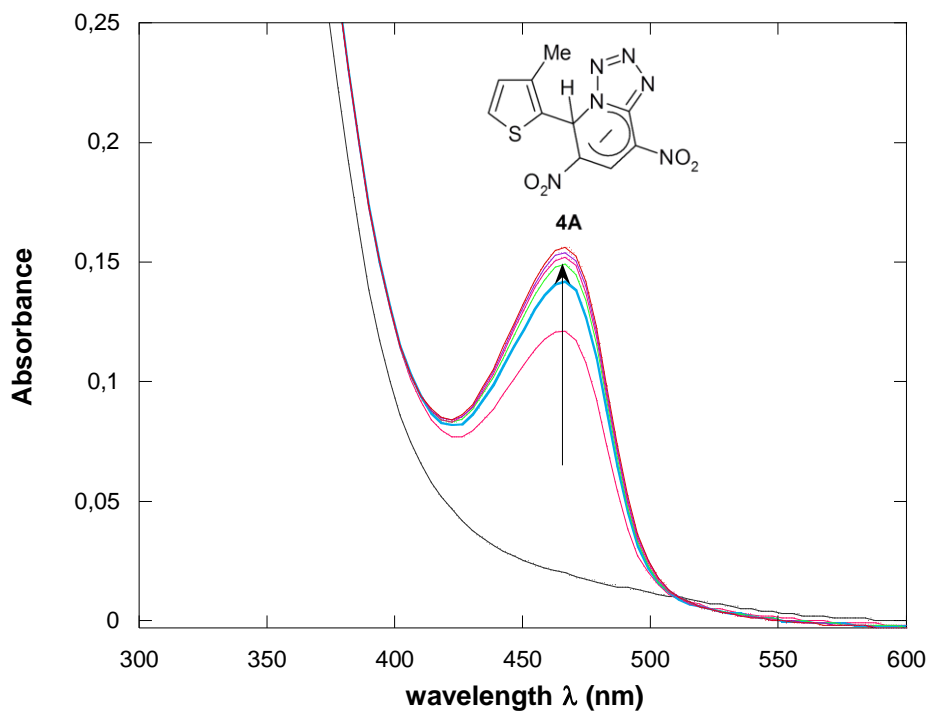

**Figure S.1.** UV-visible spectrum of thiophene **1a** and the progressive evolution of the formation of product **4A** in acetonitrile at 20 ° C with  $[1a] = 1 \text{ mol L}^{-1}$  and  $[2a] = 5.10^{-5} \text{ mol L}^{-1}$

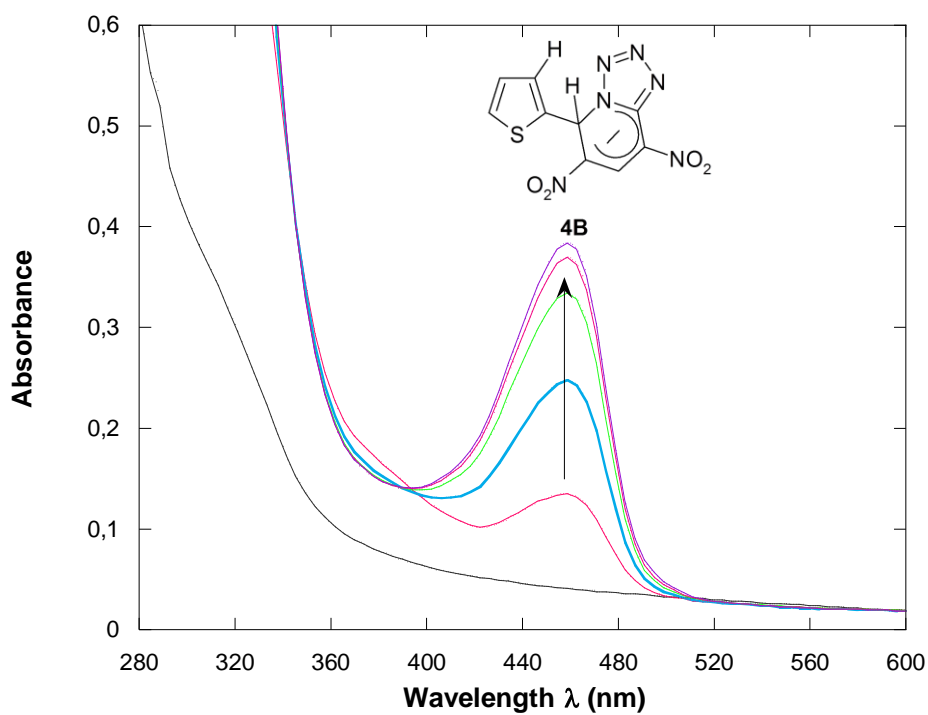

**Figure S.2.** UV-visible spectrum of thiophene **1b** and the progressive evolution of the formation of product **4B** in acetonitrile at 20 ° C with  $[1b] = 1 \text{ mol L}^{-1}$  and  $[2a] = 5.10^{-5} \text{ mol L}^{-1}$

**Table S.1**-Influence of thiophene concentration **1a** on the pseudo-first order rate constants for formation of adducts **4A**, **5A**, **5D** and **5G** in acetonitrile and at 20 ° C.

| $\sigma$ -adduct                                                                                    | [ <b>1a</b> ] (mol L <sup>-1</sup> )                                                      | <b>k</b> <sub>obsd</sub> (s <sup>-1</sup> )                                                                             |
|-----------------------------------------------------------------------------------------------------|-------------------------------------------------------------------------------------------|-------------------------------------------------------------------------------------------------------------------------|
| 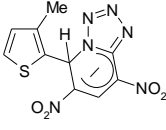 <p><b>4A</b></p>  | <p>1</p> <p>5 x 10<sup>-1</sup></p> <p>4 x 10<sup>-1</sup></p> <p>1 x 10<sup>-1</sup></p> | <p>4.14 x 10<sup>-3</sup></p> <p>2.05 x 10<sup>-3</sup></p> <p>1.66 x 10<sup>-3</sup></p> <p>5.26 x 10<sup>-4</sup></p> |
|  <p><b>5A</b></p>  | <p>1</p> <p>8 x 10<sup>-1</sup></p> <p>6 x 10<sup>-1</sup></p> <p>4 x 10<sup>-1</sup></p> | <p>2.71 x 10<sup>-3</sup></p> <p>2.08 x 10<sup>-3</sup></p> <p>1.68 x 10<sup>-3</sup></p> <p>1.12 x 10<sup>-3</sup></p> |
|  <p><b>5D</b></p>  | <p>1</p> <p>6 x 10<sup>-1</sup></p> <p>4 x 10<sup>-1</sup></p> <p>2 x 10<sup>-1</sup></p> | <p>1.24 x 10<sup>-3</sup></p> <p>8.01 x 10<sup>-4</sup></p> <p>5.08 x 10<sup>-4</sup></p> <p>2.81 x 10<sup>-5</sup></p> |
|  <p><b>5G</b></p> | <p>1</p> <p>8 x 10<sup>-1</sup></p> <p>6 x 10<sup>-1</sup></p> <p>4 x 10<sup>-1</sup></p> | <p>3.50 x 10<sup>-5</sup></p> <p>2.79 x 10<sup>-5</sup></p> <p>1.89 x 10<sup>-5</sup></p> <p>1.07 x 10<sup>-5</sup></p> |

**Table S.2**-Influence of thiophene concentration **1b** on the pseudo-first order rate constants for formation of adducts **4B**, **5B**, **5E** and **5H** in acetonitrile and at 20 ° C.

| $\sigma$ -adduct                                                                                     | [ <b>1b</b> ] (mol L <sup>-1</sup> )                                                                        | <b>k</b> <sub>obsd</sub> (s <sup>-1</sup> )                                                                             |
|------------------------------------------------------------------------------------------------------|-------------------------------------------------------------------------------------------------------------|-------------------------------------------------------------------------------------------------------------------------|
| 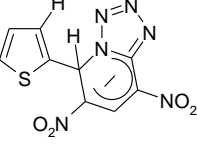 <p><b>4B</b></p> | <p>1</p> <p>5 x 10<sup>-1</sup></p> <p>2 x 10<sup>-1</sup></p> <p>1 x 10<sup>-1</sup></p>                   | <p>1.28 x 10<sup>-3</sup></p> <p>6.39 x 10<sup>-4</sup></p> <p>2.58 x 10<sup>-4</sup></p> <p>1.29 x 10<sup>-4</sup></p> |
|  <p><b>5B</b></p> | <p>5 x 10<sup>-1</sup></p> <p>4 x 10<sup>-1</sup></p> <p>2 x 10<sup>-1</sup></p> <p>1 x 10<sup>-1</sup></p> | <p>3.61 x 10<sup>-4</sup></p> <p>2.86 x 10<sup>-4</sup></p> <p>1.48 x 10<sup>-4</sup></p> <p>7.36 x 10<sup>-5</sup></p> |
|  <p><b>5E</b></p> | <p>1</p> <p>8 x 10<sup>-1</sup></p> <p>5 x 10<sup>-1</sup></p> <p>2 x 10<sup>-1</sup></p>                   | <p>3.42 x 10<sup>-4</sup></p> <p>2.69 x 10<sup>-4</sup></p> <p>1.67 x 10<sup>-4</sup></p> <p>7.19 x 10<sup>-5</sup></p> |
|  <p><b>5H</b></p> | <p>1</p> <p>8 x 10<sup>-1</sup></p> <p>6 x 10<sup>-1</sup></p> <p>4 x 10<sup>-1</sup></p>                   | <p>1.80 x 10<sup>-5</sup></p> <p>1.56 x 10<sup>-5</sup></p> <p>1.28 x 10<sup>-5</sup></p> <p>9.92 x 10<sup>-6</sup></p> |

**Table S.3**-Influence of thiophene concentration **1c** on the pseudo-first order rate constants for formation of adducts **4C**, **5C**, **5F** and **5I** in acetonitrile and at 20 ° C.

| $\sigma$ -adduct                                                                                    | [ <b>1c</b> ] (mol L <sup>-1</sup> )                                                      | <b>k</b> <sub>obsd</sub> (s <sup>-1</sup> )                                                                             |
|-----------------------------------------------------------------------------------------------------|-------------------------------------------------------------------------------------------|-------------------------------------------------------------------------------------------------------------------------|
| 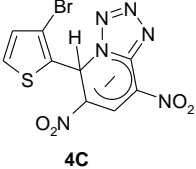 <p><b>4C</b></p>  | <p>1</p> <p>8 x 10<sup>-1</sup></p> <p>6 x 10<sup>-1</sup></p> <p>4 x 10<sup>-1</sup></p> | <p>3.36 x 10<sup>-4</sup></p> <p>2.84 x 10<sup>-4</sup></p> <p>2.05 x 10<sup>-4</sup></p> <p>1.41 x 10<sup>-4</sup></p> |
|  <p><b>5C</b></p>  | <p>1</p> <p>8 x 10<sup>-1</sup></p> <p>6 x 10<sup>-1</sup></p> <p>4 x 10<sup>-1</sup></p> | <p>2.27 x 10<sup>-4</sup></p> <p>1.76 x 10<sup>-4</sup></p> <p>1.33 x 10<sup>-4</sup></p> <p>1.00 x 10<sup>-4</sup></p> |
|  <p><b>5F</b></p>  | <p>1</p> <p>8 x 10<sup>-1</sup></p> <p>6 x 10<sup>-1</sup></p> <p>2 x 10<sup>-1</sup></p> | <p>1.09 x 10<sup>-4</sup></p> <p>8.35 x 10<sup>-5</sup></p> <p>6.75 x 10<sup>-5</sup></p> <p>2.11 x 10<sup>-5</sup></p> |
|  <p><b>5I</b></p> | <p>1</p> <p>8 x 10<sup>-1</sup></p> <p>6 x 10<sup>-1</sup></p> <p>4 x 10<sup>-1</sup></p> | <p>4.53 x 10<sup>-6</sup></p> <p>3.76 x 10<sup>-6</sup></p> <p>2.69 x 10<sup>-6</sup></p> <p>1.98 x 10<sup>-6</sup></p> |

**Table-S.4-** Values of  $\lambda_{\max}$  and molar extinction coefficients  $\epsilon$  for  $\sigma$ -adducts **4** and **5** in acetonitrile at 20 ° C.

| $\sigma$ -adduct                                                                                    | $\lambda_{\max}$ (nm)         | $\epsilon$ (mol <sup>-1</sup> L cm <sup>-1</sup> ) |
|-----------------------------------------------------------------------------------------------------|-------------------------------|----------------------------------------------------|
| 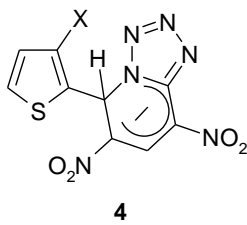 <p><b>4</b></p>   | <p><b>4A</b><br/>(X = Me)</p> | 15400                                              |
|                                                                                                     | <p><b>4B</b><br/>(X = H)</p>  | 22400                                              |
|                                                                                                     | <p><b>4C</b><br/>(X = Br)</p> | 17100                                              |
|  <p><b>5</b></p>   | <p><b>5A</b><br/>(X = Me)</p> | 67700                                              |
|                                                                                                     | <p><b>5B</b><br/>(X = H)</p>  | 36300                                              |
|                                                                                                     | <p><b>5C</b><br/>(X = Br)</p> | 87100                                              |
|  <p><b>5</b></p> | <p><b>5D</b><br/>(X = Me)</p> | 34500                                              |
|                                                                                                     | <p><b>5E</b><br/>(X = H)</p>  | 57300                                              |
|                                                                                                     | <p><b>5F</b><br/>(X = Br)</p> | 16400                                              |
|  <p><b>5</b></p> | <p><b>5G</b><br/>(X = Me)</p> | 5900                                               |
|                                                                                                     | <p><b>5H</b><br/>(X = H)</p>  | 4230                                               |
|                                                                                                     | <p><b>5I</b><br/>(X = Br)</p> | 5100                                               |
